# Supplementary material for: Systematic review of the receptor tyrosine kinase superfamily in neuroblastoma pathophysiology.
Source: Springer Nature journal article supplement (doi:10.1007/s10555-021-10001-7), 2022-03-01

# Supplementary Figure 1. Associations of RTK gene expression to neuroblastoma patient survival by phylogenetic classification.

| Class | Family  | RTK     | 786 Cangelioli | 649 Kocac | 498 SEQC RPM | 498 SEQC custom | 283 Primary NRD | 251 Oberthuer | 249 Asgharzadeh | 102 Seeger | 101 Maris | 88 Versteeg | score |
|-------|---------|---------|----------------|-----------|--------------|-----------------|-----------------|---------------|-----------------|------------|-----------|-------------|-------|
| I     | EGRF    | EGRF    |                |           |              |                 |                 |               |                 |            |           |             | -2    |
|       | ERBB2   | ERBB2   | 7.7E-03        |           |              |                 |                 |               |                 |            |           |             | 32    |
|       | ERBB3*  | ERBB3*  | 2.6E-08        | 2.8E-05   | 4.9E-08      | 2.8E-09         | 6.8E-06         |               |                 |            |           |             | 54    |
|       | ERBB4   | ERBB4   |                |           |              |                 |                 |               |                 |            |           |             | -10   |
| II    | INSR    | IGF1R   | 3.5E-06        | 8.6E-08   | 9.3E-03      | 2.5E-03         | 5.3E-04         |               |                 |            |           |             | 55    |
|       | INSR    | INSR    |                |           |              |                 |                 |               |                 |            |           |             | 21    |
|       | INSRR   | INSRR   | 3.1E-06        |           |              |                 |                 |               |                 |            |           |             | 73    |
|       | PDGFR   | PDGFRB  | 4.2E-06        | 4.6E-03   | 8.0E-05      | 3.9E-04         | 1.8E-03         |               |                 |            |           |             | -85   |
|       | PDGFRB  | PDGFRB  |                |           |              |                 |                 |               |                 |            |           |             | 12    |
|       | CSF1R   | CSF1R   | 2.5E-07        | 1.8E-06   |              |                 |                 |               |                 |            |           |             | 40    |
|       | KIT     | KIT     | 2.2E-07        | 2.1E-03   |              |                 |                 |               |                 |            |           |             | -71   |
|       | FLT3    | FLT3    | 4.5E-02        | 2.0E-07   |              |                 |                 |               |                 |            |           |             | 40    |
| IV    | VEGFR   | FLT1    |                |           |              |                 |                 |               |                 |            |           |             | 8     |
|       | KDR     | KDR     | 6.7E-03        | 1.1E-02   |              |                 |                 |               |                 |            |           |             | 51    |
|       | FLT4    | FLT4    |                |           |              |                 |                 |               |                 |            |           |             | -1    |
| V     | FGFR    | FGFR1   |                |           |              |                 |                 |               |                 |            |           |             | -25   |
|       | FGFR2   | FGFR2   | 6.6E-04        | 1.4E-03   | 6.2E-08      | 6.8E-03         | 2.0E-01         | 1.2E-02       | 2.3E-02         | 1.1E-02    |           |             | -50   |
|       | FGFR3   | FGFR3   |                |           |              |                 |                 |               |                 |            |           |             | -30   |
|       | FGFR4   | FGFR4   |                |           |              |                 |                 |               |                 |            |           |             | 22    |
| VI    | CCK     | PTK7*   | 1.7E-05        |           |              |                 |                 |               |                 |            |           |             | -20   |
|       | TRK     | NTRK1   | 3.4E-33        | 6.0E-23   | 4.5E-22      | 5.2E-23         | 4.2E-22         |               |                 |            |           |             | 130   |
|       | NTRK2   | NTRK2   |                |           |              |                 |                 |               |                 |            |           |             | -21   |
|       | NTRK3   | NTRK3   |                |           |              |                 |                 |               |                 |            |           |             | 42    |
| VIII  | HGR     | MET     | 5.6E-11        | 8.7E-08   |              |                 |                 |               |                 |            |           |             | -54   |
|       | MST1R   | MST1R   | 3.0E-16        | 6.4E-12   |              |                 |                 |               |                 |            |           |             | 56    |
| IX    | EphR    | EphA1   |                |           |              |                 |                 |               |                 |            |           |             | 30    |
|       | EphA2   | EphA2   | 4.7E-02        | 1.2E-03   |              |                 |                 |               |                 |            |           |             | 30    |
|       | EphA3   | EphA3   |                |           |              |                 |                 |               |                 |            |           |             | -10   |
|       | EphA4   | EphA4   | 2.5E-02        | 2.6E-03   | 1.9E-02      | 1.3E-02         | 8.8E-04         | 2.0E-06       | 6.2E-05         |            |           |             | 43    |
|       | EphA5   | EphA5   | 1.1E-20        | 8.2E-13   | 4.0E-12      | 1.8E-13         | 1.7E-14         |               |                 |            |           |             | 104   |
|       | EphA6   | EphA6   |                |           |              |                 |                 |               |                 |            |           |             | 30    |
|       | EphA7   | EphA7   | 2.5E-02        |           |              |                 |                 |               |                 |            |           |             | 62    |
|       | EphA8   | EphA8   |                |           |              |                 |                 |               |                 |            |           |             | 10    |
|       | EphA10* | EphA10* | 3.7E-12        | 3.6E-15   |              |                 |                 |               |                 |            |           |             | 65    |
|       | EphB1   | EphB1   |                |           |              |                 |                 |               |                 |            |           |             | -32   |
|       | EphB2   | EphB2   |                |           |              |                 |                 |               |                 |            |           |             | 10    |
|       | EphB3   | EphB3   | 4.2E-03        | 5.8E-04   |              |                 |                 |               |                 |            |           |             | 60    |
|       | EphB4   | EphB4   |                | 3.3E-03   |              |                 |                 |               |                 |            |           |             | -30   |
|       | EphB6*  | EphB6*  | 2.0E-08        | 1.0E-03   |              |                 |                 |               |                 |            |           |             | 60    |
| X     | AXL     | AXL     | 1.4E-06        | 5.5E-10   |              |                 |                 |               |                 |            |           |             | 44    |
|       | MERTK   | MERTK   | 4.2E-04        | 1.1E-04   |              |                 |                 |               |                 |            |           |             | 41    |
|       | TYRO3   | TYRO3   | 2.6E-03        |           |              |                 |                 |               |                 |            |           |             | -20   |
| XI    | TIE     | TIE1    |                |           |              |                 |                 |               |                 |            |           |             | -20   |
|       | TEK     | TEK     | 1.9E-05        | 5.9E-03   |              |                 |                 |               |                 |            |           |             | 30    |
| XII   | RYK     | RYK*    | 7.6E-11        | 3.0E-05   |              |                 |                 |               |                 |            |           |             | -65   |
|       | DDR     | DDR1    |                |           |              |                 |                 |               |                 |            |           |             | 26    |
|       | DDR2    | DDR2    | 1.2E-15        | 1.4E-13   | 2.0E-10      |                 |                 |               |                 |            |           |             | -102  |
| XIV   | RET     | RET     | 5.4E-14        | 1.0E-11   | 6.4E-16      |                 |                 |               |                 |            |           |             | -102  |
| XV    | ROS     | ROS1    | 9.2E-09        |           |              |                 |                 |               |                 |            |           |             | 10    |
| XVI   | LTKR    | LTK     |                |           |              |                 |                 |               |                 |            |           |             | 23    |
|       | ALK     | ALK     | 2.7E-08        | 2.4E-06   |              |                 |                 |               |                 |            |           |             | -70   |
| XVII  | ROR     | ROR1*   |                |           |              |                 |                 |               |                 |            |           |             | -60   |
|       | ROR2*   | ROR2*   | 4.2E-09        | 7.1E-05   |              |                 |                 |               |                 |            |           |             | 43    |
| XVIII | Musk    | MUSK    |                | 7.6E-03   |              |                 |                 |               |                 |            |           |             | 12    |
| XIX   | LHR     | AATK    | 8.1E-05        | 6.7E-03   |              |                 |                 |               |                 |            |           |             | 43    |
|       | LMTK2   | LMTK2   |                | 7.9E-05   |              |                 |                 |               |                 |            |           |             | -10   |
|       | LMTK3   | LMTK3   | 1.4E-10        | 9.1E-12   |              |                 |                 |               |                 |            |           |             | 43    |
| XX    | STYK    | STYK1*  | 2.5E-02        | 1.8E-03   |              |                 |                 |               |                 |            |           |             | -30   |

|                       |                    |                    |
|-----------------------|--------------------|--------------------|
| negative correlations | 5.0E-02 to 9.9E-04 | 5.0E-02 to 9.9E-04 |
|                       | 1.0E-05 to 9.9E-09 | 1.0E-05 to 9.9E-09 |
|                       | <1.0E-10           | 1.0E-10 to 9.9E-19 |
|                       |                    | <4.0E-20           |

## Supplementary Figure 2.

**a** *PDGFRA* expression correlation

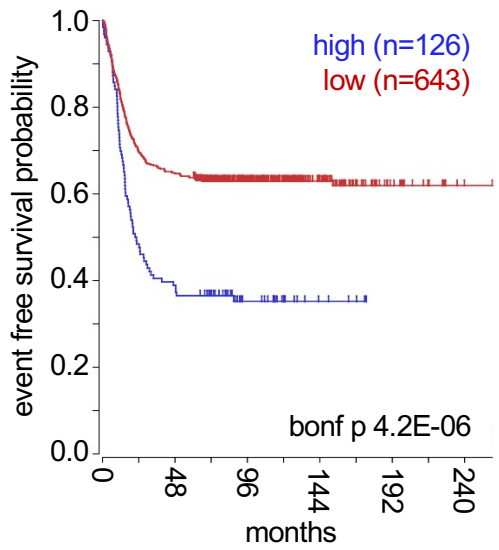

**b** *PDGFRA* expression in cancer cell lines

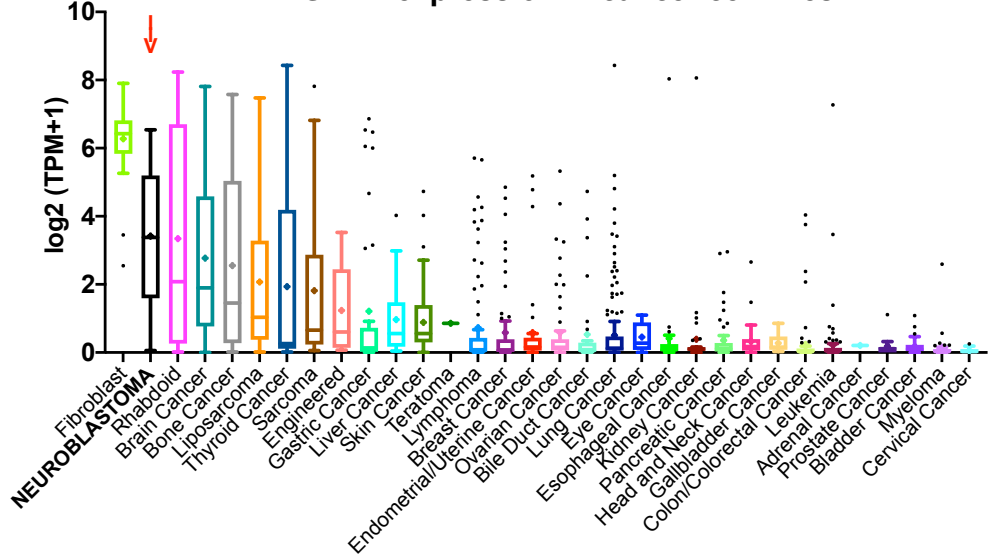

**c** *RYK/ROR* expression in tumor samples

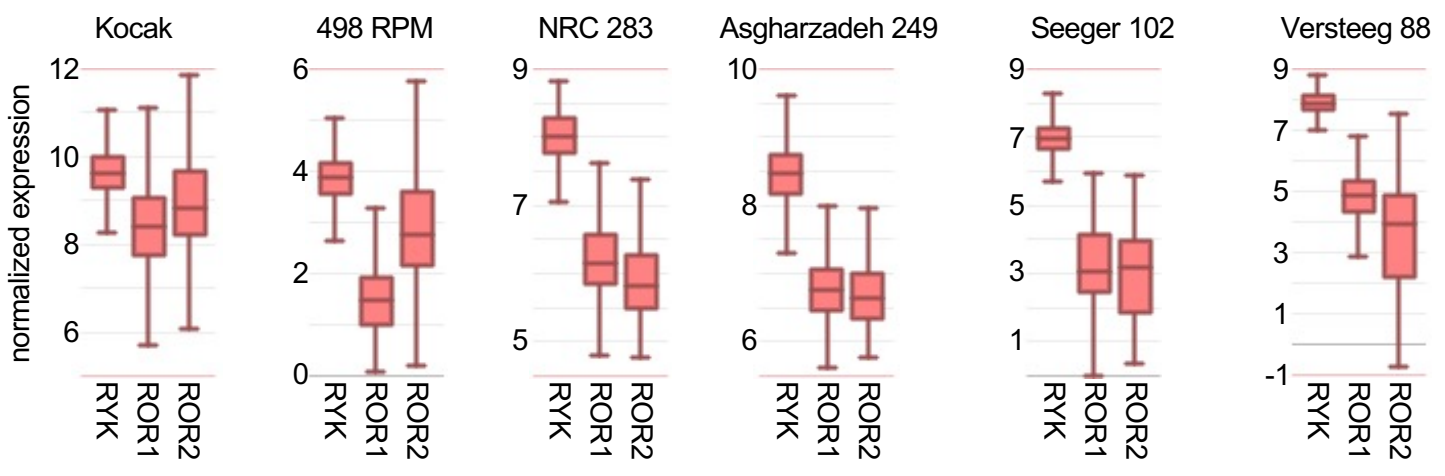

Supplement: MOESM1 [file 19813812]
